# Supplementary material for: In vitrotoxicity of carbon nanotubes: a systematic review
Source: Royal Society of Chemistry journal article supplement (doi:10.1039/d2ra02519a), 2022-01-01
Supplement: d2ra02519a1.pdf [file d2ra02519a1.pdf]

Electronic Supplementary Information for the manuscript:

# ***In Vitro* Toxicity of Carbon Nanotube: a Systematic Review**

*Margarita R. Chetyrkina<sup>a</sup>, Fedor S. Fedorov<sup>a\*</sup> and Albert G. Nasibulin<sup>a,b\*</sup>*

<sup>a</sup>Skolkovo Institute of Science and Technology, Nobel St. 3, Moscow 143026,  
Russia

<sup>b</sup>Aalto University, FI-00076, 15100, Espoo, Finland

## **Contents**

|                                                                                                  |    |
|--------------------------------------------------------------------------------------------------|----|
| Table S1. Manufacturers of CNTs applied for toxicity <i>in vitro</i> tests. ....                 | 2  |
| Table S2. Types of cells used in cytotoxic studies (CNTs as substrate or in<br>dispersion). .... | 5  |
| References .....                                                                                 | 11 |

**Table S1. Manufacturers of CNTs applied for toxicity *in vitro* tests.**

| Company, Location                                     | Substrate | Dispersion |
|-------------------------------------------------------|-----------|------------|
| Applied Carbon Nano Technology Co. Ltd., Rep of Korea | -         | 1          |
| Applied Sciences Inc., USA                            | 2–4       | 5          |
| Bayer Technology Service GmbH, Germany                | -         | 6, 7       |
| Bussan Nanotech Research Institute Inc. (XNRI), Japan | -         | 8–10       |
| Bucky Inc., USA                                       | -         | 11         |
| CarboLex Inc., USA                                    | 12, 13    | 14–16      |
| Carbon Nanotechnologies Inc., USA                     | 17–19     | 20–29      |
| Carbon Solutions Inc., USA                            | 30–34     |            |
| Cheap Tubes Inc., USA                                 | -         | 35–41      |
| Chengdu Organic Chemicals Co. Ltd., China             | -         | 42         |
| CorMedix Inc. France                                  | -         | 43         |
| HeJi Inc. China                                       | -         | 44–47      |
| Helix Material Solutions Inc., USA                    | -         | 48         |
| Hodogaya Chemical Co. Ltd., Japan                     | -         | 49         |
| JRC Nanomaterials Repository, EU                      | -         | 50         |
| Mitsui & Co. Ltd., Japan                              | -         | 9, 51, 52  |
| MK Impex Corp., Canada                                | -         | 53         |
| Nanocyl SA., Belgium                                  | -         | 54–56      |
| NanoLab Inc., USA                                     | 57–61     | 45, 62, 63 |

---

|                                                               |        |                            |
|---------------------------------------------------------------|--------|----------------------------|
| Nanoledge Inc., Canada                                        | 64     | 65                         |
| Nanostructured and Amorphous<br>Material (NanoAmor) Inc., USA | 66, 67 | 68–73                      |
| NanoTexLab, USA                                               | -      | 74                         |
| Nanothinx S.A., Greece                                        | -      | 75–80                      |
| NEC Corp., Japan                                              | -      | 81                         |
| Hanwha Nanotech Corp., Korea                                  | -      | 82, 83                     |
| NASA-JSC, USA                                                 | -      | 84                         |
| IJJIN Diamond Co. Ltd, Korea                                  | -      | 23                         |
| Shenzhen Nanotech Port Co. Ltd.,<br>China                     | -      | 85–91                      |
| Showa Denko Materials Co. Ltd.,<br>Japan                      | -      | 92–94                      |
| Sigma-Aldrich Inc., USA                                       | 95     | 96, 97, 98–105,<br>106–108 |
| Southwest Nanotechnologies Inc.,<br>USA                       | -      | 109                        |
| Sun Nanotech Co. Ltd., China                                  | -      | 110                        |
| Pyrograf Products Inc., USA                                   | -      | 111                        |
| Tsinghua and Nanfeg Co. Ltd., China                           | -      | 112                        |
| Nanjing XFNANO Materials Tech<br>Co. Ltd., China              | -      | 113–121                    |
| Yangtze Nanotechnology Co. Ltd.,<br>China                     | -      | 122–124                    |

---

**Table S2. Types of cells used in cytotoxic studies (CNTs as substrate or as dispersion).**

| <b>Cell type</b>                               | <b>Substrate</b> | <b>Dispersion</b>                                                                                                   |
|------------------------------------------------|------------------|---------------------------------------------------------------------------------------------------------------------|
| A549<br>(Human adenocarcinoma)                 | -                | 6, 15, 25, 26, 36, 39, 41, 46, 47, 55, 68, 69, 71, 80, 97, 100, 101, 105, 108, 110, 124, 125, 126, 127–134, 135–138 |
| Adenocarcinoma                                 | -                | 7                                                                                                                   |
| Alveolar macrophages                           | -                | 79, 80, 126, 139, 140                                                                                               |
| AsPC-1<br>(Human pancreatic tumor)             | 141              | -                                                                                                                   |
| Astrocyte cells                                | 4                | 11, 36, 90                                                                                                          |
| Beas2B<br>(Human bronchial epithelium, normal) | -                | 10, 37, 40, 47, 49, 52, 92, 94, 103, 105, 142–144                                                                   |
| BxPC<br>(Human pancreatic cancer)              | 141              | -                                                                                                                   |
| Caco<br>(Human colorectal adenocarcinoma)      | 59               | 28                                                                                                                  |
| Calu<br>(Human non-small-cell lung cancer)     | -                | 80, 111                                                                                                             |
| CHO-K1<br>(Hamster ovary)                      | -                | 8, 10                                                                                                               |
| Cortical cultures                              | 145, 146         | 75                                                                                                                  |
| DRGNs (dorsal ganglion neurons)                | 146              | 147                                                                                                                 |

---

|                                                                    |                  |                  |
|--------------------------------------------------------------------|------------------|------------------|
| Dendritic cells                                                    | -                | 87               |
| L929<br>(Fibroblast mouse)                                         | 57, 67, 148, 149 | -                |
| Glioma                                                             | -                | 150              |
| H1299<br>(Human non-small cell<br>lung carcinoma)                  | -                | 118, 125         |
| H19-7<br>(Immortalized rat<br>hippocampal cells)                   | 151              | -                |
| H466<br>(Human small cell lung<br>cancer)                          | -                | 111              |
| H596<br>(Human lung<br>adenosquamous<br>carcinoma)                 | -                | 111              |
| H9C2<br>(Rat hear cells)                                           | -                | 20               |
| HaCAT<br>(Human immortalized<br>keratinocyte)                      | -                | 125              |
| HAEC<br>(Human aortic endothelial<br>cells)                        | -                | 51, 74           |
| HA-SMCs<br>(Human aortic Smooth<br>muscle)                         | 59               | 120              |
| HBEC-3KT<br>(Infecting primary human<br>bronchial epithelial cell) | 152              | -                |
| HEK<br>(Human epidermal<br>keratinocytes)                          | -                | 84, 153–155      |
| HEK 293<br>(Human embryonic<br>kidney)                             | 156              | 21, 108, 157–159 |

---

---

|                                                     |                              |                                  |
|-----------------------------------------------------|------------------------------|----------------------------------|
| HeLa<br>(Adenocarcinoma)                            | -                            | 16, 86, 109, 125, 160            |
| Hep3B<br>(Human hepatocellular carcinoma)           | -                            | 16, 133, 161                     |
| HepG2<br>(Human hepatocellular carcinoma)           | -                            | 40, 108, 113, 138, 159, 161, 162 |
| hESCs<br>(Human embryonic stem cells)               | 19, 95                       | -                                |
| Hippocampal neurons                                 | 17, 30, 33, 64, 66, 163, 164 | -                                |
| HL-60<br>(Promyelocytic cell line)                  | 59, 61                       | -                                |
| hMDMs<br>(Human monocyte-derived macrophages)       | 156                          | 27, 38, 165–167                  |
| hMSCs<br>(Human mesenchymal stem cells)             | 34                           | 1, 54, 73, 78, 89, 168           |
| HT 29<br>(Human colorectal adenocarcinoma)          | -                            | 169                              |
| HUH7<br>(Human liver carcinoma)                     | 170                          | -                                |
| Human Lymph Node Endothelial Cell                   | -                            | 81                               |
| Human Brain Microvascular Endothelial Cells (HBMEC) | -                            | 72                               |
| Human chondrocytes                                  | 3                            | -                                |
| Human fibroblasts                                   | 59, 171                      | 105, 159, 172, 173               |
| Human osteoblasts                                   | 2–4, 58, 171, 174            | 5                                |

---

---

|                                                      |             |                                                                       |
|------------------------------------------------------|-------------|-----------------------------------------------------------------------|
| HUVEC<br>(Human umbilical vein<br>endothelial cells) | -           | 42, 16, 65, 69, 106, 114–<br>116, 119, 121, 126, 162,<br>172, 175–179 |
| J774<br>(Mouse BALB/C<br>monocyte macrophage)        | -           | 8, 110, 165, 180                                                      |
| Jurkat<br>(Human T lymphocyte<br>cells)              | 156         | 6, 70, 102                                                            |
| K-562<br>(Myelogenous leukemia<br>cell)              | 61          | -                                                                     |
| Liver normal cell                                    | -           | 181                                                                   |
| Lung epithelial cells                                | -           | 10, 26, 35, 50, 52, 79,<br>82, 104, 168, 182, 183                     |
| Lymphocytes                                          | -           | 44, 62, 63, 83                                                        |
| MCF7<br>(Human breast cancer)                        | 59          | 77, 98, 136, 153, 184                                                 |
| Mesothelioma                                         | -           | 9, 92, 94, 99, 122, 142,<br>143, 185                                  |
| Mononucler cell                                      | -           | 186                                                                   |
| Mouse ESCs                                           | -           | 112                                                                   |
| Mouse fibroblasts                                    | 4, 152, 187 | -                                                                     |
| NSCs<br>(neural stem cells)                          | 18, 32      | -                                                                     |
| Neuroblastoma                                        | -           | 92, 140, 160                                                          |
| NG108-15<br>(Neuroblastoma x glioma<br>hybrid)       | 12, 13      | -                                                                     |

---

---

|                                              |        |                             |
|----------------------------------------------|--------|-----------------------------|
| NIH3T3<br>(Mouse embryonic fibroblasts)      | 60, 64 | 14, 53, 88, 188, 189        |
| NRVMs<br>(Neonatal rat ventricular myocytes) | 156    | -                           |
| Osteosarcoma                                 | -      | 173                         |
| Ovine Bladder Smooth Muscle                  | 3      | -                           |
| P407<br>(Human normal epithelium)            | -      | 108, 133                    |
| Panc<br>(Hypertriploid human cell line)      | 141    | 161                         |
| PC12<br>(Rat pheochromocytoma)               | -      | 14, 147, 190                |
| Pheochromocytoma                             | 4      | -                           |
| Primary Glial cells                          | -      | 43, 123                     |
| Primary Immune cells                         | -      | 24, 191                     |
| Primary Neurons                              | -      | 70, 123                     |
| R264.7<br>(Mouse macrophages)                | -      | 22, 55, 56, 77, 80, 91, 107 |
| Rat or mice macrophages                      | -      | 68                          |
| Rat osteoblasts                              | 31     | -                           |
| Red Blood Cells                              | -      | 14                          |

---



---

|                                                              |            |                       |
|--------------------------------------------------------------|------------|-----------------------|
| RLE-6TN<br>(Rat lung epithelial-T-<br>antigen negative) cell | -          | 37                    |
| Schwann cells                                                | 146        | -                     |
| SH-SY5Y<br>(Human neuroblastoma)                             | 156        | 76                    |
| Skin fibroblasts                                             | 3, 67, 146 | 23, 45, 96, 192, 193  |
| Splenocytes                                                  | -          | 70                    |
| SNU182<br>(Human hepatocellular<br>carcinoma)                | 170        | -                     |
| THP-1<br>(Human monocytic cell)                              | -          | 37, 92, 117, 194, 195 |
| U-937<br>(Human macrophages)                                 | 61         | 97                    |

---

## References

- 1 H. B. Kim, B. Jin, D. K. Patel, J. W. Kim, J. Kim, H. Seonwoo and K. T. Lim, *IEEE Trans. Nanobioscience*, 2019, **18**, 463–468.
- 2 K. L. Elias, R. L. Price and T. J. Webster, *Biomaterials*, 2002, **23**, 3279–3287.
- 3 R. L. Price, M. C. Waid, K. M. Haberstroh and T. J. Webster, *Biomaterials*, 2003, **24**, 1877–1887.
- 4 T. J. Webster, M. C. Waid, J. L. McKenzie, R. L. Price and J. U. Ejiofor, *Nanotechnology*, 2004, **15**, 48–54.
- 5 R. L. Price, K. M. Haberstroh and T. J. Webster, *Nanotechnology*, 2004, **15**, 892.
- 6 T. Thurnherr, C. Brandenberger, K. Fischer, L. Diener, P. Manser, X. Maeder-Althaus, J. P. Kaiser, H. F. Krug, B. Rothen-Rutishauser and P. Wick, *Toxicol. Lett.*, 2011, **200**, 176–186.
- 7 A. Simon, S. X. Maletz, H. Hollert, A. Schäffer and H. M. Maes, *Nanoscale Res. Lett.*, 2014, **9**, 396.
- 8 S. Hirano, S. Kanno and A. Furuyama, *Toxicol. Appl. Pharmacol.*, 2008, **232**, 244–251.
- 9 M. Pacurari, X. J. Yin, M. Ding, S. S. Leonard, D. Schwegler-berry, B. S. Ducatman, M. Chirila, M. Endo, V. Castranova and V. Vallyathan, *Nanotoxicology*, 2008, **2**, 155-170.
- 10 S. Hirano, Y. Fujitani, A. Furuyama and S. Kanno, *Toxicol. Appl. Pharmacol.*, 2010, **249**, 8–15.
- 11 L. Dong, K. L. Joseph, C. M. Witkowski and M. M. Craig, *Nanotechnology*, 2008, **19**, 255702.
- 12 M. K. Gheith, V. A. Sinani, J. P. Wicksted, R. L. Matts and N. A. Kotov, *Adv. Mater.*, 2005, **17**, 2663–2670.
- 13 M. K. Gheith, T. C. Pappas, A. V. Liopo, V. A. Sinani, B. S. Shim, M. Motamedi, J. P. Wicksted and N. A. Kotov, *Adv. Mater.*, 2006, **18**, 2975–2979.
- 14 T. Crouzier, A. Nimmagadda, M. U. Nollert and P. S. McFetridge, *Langmuir*, 2008, **24**, 13173–13181.
- 15 S. Wadhwa, C. Rea, P. O’Hare, A. Mathur, S. S. Roy, P. S. M. Dunlop, J. A. Byrne, G. Burke, B. Meenan and J. A. McLaughlin, *J. Hazard. Mater.*, 2011, **191**, 56–61.
- 16 F. Valentini, E. Mari, A. Zicari, A. Calcaterra, M. Talamo, M. G. Scioli, A.

- Orlandi and S. Mardente, *Int. J. Mol. Sci.*, 2018, **19**, 1316.
- 17 A. Mazzatenta, M. Giugliano, S. Campidelli, L. Gambazzi, L. Businaro, H. Markram, M. Prato and L. Ballerini, *J. Neurosci.*, 2007, **27**, 6931–6936.
  - 18 N. W. S. Kam, E. Jan and N. A. Kotov, *Nano Lett.*, 2009, **9**, 273–278.
  - 19 T. I. Chao, S. Xiang, C. S. Chen, W. C. Chin, A. J. Nelson, C. Wang and J. Lu, *Biochem. Biophys. Res. Commun.*, 2009, **384**, 426–430.
  - 20 S. Garibaldi, C. Brunelli, V. Bavastrello, G. Ghigliotti and C. Nicolini, *Nanotechnology*, 2006, **17**, 391–397.
  - 21 D. Cui, F. Tian, C. S. Ozkan, M. Wang and H. Gao, *Toxicol. Lett.*, 2005, **155**, 73–85.
  - 22 V. E. Kagan, Y. Y. Tyurina, V. A. Tyurin, N. V. Konduru, A. I. Potapovich, A. N. Osipov, E. R. Kisin, D. Schwegler-Berry, R. Mercer, V. Castranova and A. A. Shvedova, *Toxicol. Lett.*, 2006, **165**, 88–100.
  - 23 F. Tian, D. Cui, H. Schwarz, G. G. Estrada and H. Kobayashi, *Toxicol. Vitro.*, 2006, **20**, 1202–1212.
  - 24 H. Dumortier, S. Lacotte, G. Pastorin, R. Marega, W. Wu, D. Bonifazi, J. P. Briand, M. Prato, S. Muller and A. Bianco, *Nano Lett.*, 2006, **6**, 1522–1528.
  - 25 M. Davoren, E. Herzog, A. Casey, B. Cottineau, G. Chambers, H. J. Byrne and F. M. Lyng, *Toxicol. Vitro.*, 2007, **21**, 438–448.
  - 26 E. Herzog, H. J. Byrne, A. Casey, M. Davoren, A. G. Lenz, K. L. Maier, A. Duschl and G. J. Oostingh, *Toxicol. Appl. Pharmacol.*, 2009, **234**, 378–390.
  - 27 A. E. Porter, M. Gass, J. S. Bendall, K. Muller, A. Goode, J. N. Skepper, P. A. Midgley and Mark Welland, *ACS Nano*, 2009, **3**, 1485–1492.
  - 28 A. Jos, S. Pichardo, M. Puerto, E. Sánchez, A. Grilo and A. M. Cameán, *Toxicol. Vitro.*, 2009, **23**, 1491–1496.
  - 29 N. Azad, A. K. V Iyer, L. Wang, Y. Liu, Y. Lu and Y. Rojanasakul, *Nanotoxicol.*, 2014, **7**, 157–168.
  - 30 H. Hu, Y. Ni, S. K. Mandal, V. Montana, B. Zhao, R. C. Haddon and V. Parpura, *J. Phys. Chem. B*, 2005, **109**, 4285–4289.
  - 31 L. P. Zanello, B. Zhao, H. Hu and R. C. Haddon, *Nano Lett.*, 2006, **6**, 562–567.
  - 32 E. Jan and N. A. Kotov, *Nano Lett.*, 2007, **7**, 1123–1128.
  - 33 E. B. Malarkey, K. A. Fisher, E. Bekyarova, W. Liu, R. C. Haddon and V. Parpura, *Nano Lett.*, 2009, **9**, 264–268.

- 34 C. Y. Tay, H. Gu, W. S. Leong, H. Yu, H. Q. Li, B. C. Heng, H. Tantang, S. C. Joachim Loo, L. J. Li and L. P. Tan, *Carbon*, 2010, **48**, 1095–1104.
- 35 R. K. Saxena, W. Williams, J. K. McGee, M. J. Daniels, E. Boykin and M. I. Gilmour, *Nanotoxicology*, 2007, **1**, 291–300.
- 36 T. Coccini, E. Roda, D. A. Sarigiannis, P. Mustarelli, E. Quartarone, A. Profumo and L. Manzo, *Toxicology*, 2010, **269**, 41–53.
- 37 T. Xia, R. F. Hamilton, J. C. Bonner, E. D. Crandall, A. Elder, F. Fazlollahi, T. A. Girtsman, K. Kim, S. Mitra, S. A. Ntim, G. Orr, M. Tagmount, A. J. Taylor, D. Telesca, A. Tolic, C. D. Vulpe, A. J. Walker, X. Wang, F. A. Witzmann, N. Wu, Y. Xie, J. I. Zink, A. Nel and A. Holianvol, *Environ. Health Perspect.*, 2013, **121**, 683–691.
- 38 M. J. D. Clift, C. Endes, D. Vanhecke, P. Wick, P. Gehr, R. P. F. Schins, A. Petri-Fink and B. Rothen-Rutishauser, *Toxicol. Sci.*, 2014, **137**, 55–64.
- 39 M. Mrakovcic, C. Meindl, G. Leitinger and E. Roblegg, *Toxicol. Sci.*, 2015, **144**, 114-127..
- 40 N. Chatterjee, J. Yang, D. Yoon, S. Kim, S. W. Joo and J. Choi, *Biomaterials*, 2017, **115**, 167–180.
- 41 L. Zhou, H. J. Forman, Y. Ge, J. Lunec, and L. Angeles, *Toxicol. In Vitro*, 2017, **42**, 292–298.
- 42 T. Wen, A. Yang, L. Piao, S. Hao, L. Du, J. Meng, J. Liu, Haiyan Xu, *Int. J. Nanomedicine*, 2019, **14**, 4475–4489.
- 43 S. Fiorito, J. Russier, A. Salemme, M. Soligo, L. Manni, E. Krasnowska, S. Bonnamy, E. Flahaut, A. Serafino, G. I. Togna, L. N.J.L. Marlier and A. R. Togna, *Carbon*, 2018, **129**, 572-584
- 44 O. Zeni, R. Palumbo, R. Bernini, L. Zeni, M. Sarti and M. R. Scarfi, *Sensors (Basel)*, 2008, **8**, 488-499.
- 45 A. Patlolla, B. Knighten and P. Tchounwou, *Ethn Dis.*, 2010, **20**, 1–17.
- 46 C. L. Ursini, D. Cavallo, A. M. Fresegna, A. Ciervo, R. Maiello, G. Buresti, S. Casciardi, F. Tombolini, S. Bellucci and S. Iavicoli, *Toxicol. Vitr.*, 2012, **26**, 831–840.
- 47 C. L. Ursini, R. Maiello, A. Ciervo, A. M. Fresegna, G. Buresti, F. Superti, M. Marchetti, S. Iavicoli and D. Cavallo, *J. Appl. Toxicol.*, 2016, **36**, 394–403.
- 48 R. J. Snyder, K. C. Verhein, H. L. Vellers, A. B. Burkholder, S. Garantziotis, and S. Management, *Nanotoxicology*, 2019, **13**, 1344–1361.
- 49 H. Haniu, N. Saito, Y. Matsuda, T. Tsukahara, K. Maruyama and Y. Usui,

- Toxicol. In Vitro*, 2013, **27**, 1679–1685.
- 50 S. Phuyal, M. Kasem, L. Rubio, H. L. Karlsson, R. Marcos, V. Skaug and S. Zienolddiny, *Toxicol In Vitro.*, 2017, **44**, 230–240.
- 51 V. G. Walker, Z. Li, T. Hulderman, D. Schwegler-berry, M. L. Kashon and P. P. Simeonova, *Toxicol. Appl. Pharmacol.*, 2009, **236**, 319–328.
- 52 K. J. Siegrist, S. H. Reynolds, D. W. Porter, R. R. Mercer, A. K. Bauer, D. Lowry, L. Cena, T. A. Stueckle, M. L. Kashon, J. Wiley, J. L. Salisbury, J. Mastovich, K. Bunker, M. Sparrow, J. S. Lupoi, A. B. Stefaniak, M. J. Keane, S. Tsuruoka, M. Terrones, M. McCawley and L. M. Sargent, *Part Fibre Toxicol.*, 2019, **16**, 36.
- 53 P. Zhao, L. Chen, H. Shao, Y. Zhang, Y. Sun, Y. Ke, S. Ramakrishna, L. He and W. Xue, *Biomed. Mater.*, 2016, **11**, 015021.
- 54 E. Mooney, P. Dockery, U. Greiser, M. Murphy and V. Barron, *Nano Lett.*, 2008, **8**, 2137–2143.
- 55 B. Chen, Y. Liu, W. M. Song, Y. Hayashi, X. C. Ding, and W. H. Li, *Biomed. Environ. Sci.*, 2011, **24**, 593–601.
- 56 O. Sabido, A. Figarol and J. Klein, *Nanomaterials (Basel)*, 2020 **10**, 319.
- 57 M. A. Correa-duarte, N. Wagner, C. Morsczech, M. Thie, and M. Giersig, *Nano Lett.*, 2004, **4**, 2233–2236.
- 58 I. Firkowska, E. Godehardt and M. Giersig, *Adv. Funct. Mater.*, 2008, **18**, 3765–3771.
- 59 S. Bellucci, M. Chiaretti, A. Cucina, G. A. Carru and A. Chiaretti, *Nanomedicine*, 2009, **4**, 531–540.
- 60 S. R. Ryoo, Y. K. Kim, M. H. Kim and D. H. Min, *ACS Nano*, 2010, **4**, 6587–6598.
- 61 S. Dinicola, M. G. Masiello, S. Proietti, P. Coluccia, G. Fabrizi, A. Palombo, F. Micciulla, S. Bistarelli, G. Ricci, A. Catizone, G. De Toma, M. Bizzarri, S. Bellucci and A. Cucina, *Toxicol. In Vitro*, 2015, **29**, 1298–1308.
- 62 M. Bottini, S. Bruckner, K. Nika, N. Bottini, S. Bellucci, A. Magrini, A. Bergamaschi and T. Mustelin, *Toxicol. Lett.*, 2006, **160**, 121–126.
- 63 O. Zeni, A. Sannino, S. Romeo, F. Micciulla, S. Bellucci and M. R. Scarfi, *Nanomedicine*, 2015, **10**, 351–360.
- 64 R. A. Dubin, G. C. Callegari, J. Kohn, and A. V Neimark, *IEEE Transactions on NanoBioscience*, 2008, **7**, 11–14.

- 65 A. Albini, V. Mussi, A. Parodi, A. Ventura, E. Principi, S. Tegami, M. Rocchia, E. Francheschi, I. Sogno, R. Cammarota, G. Finzi, F. Sessa, D. McClain Noonan and U. Valbusa, *Nanomedicine*, 2010, **6**, 277–288.
- 66 V. Lovat, D. Pantarotto, L. Lagostena, B. Cacciari, M. Grandolfo, M. Righi, G. Spalluto, M. Prato and L. Ballerini, *Nano Lett.*, 2005, **5**, 1107–1110.
- 67 A. Benko, D. Medina-Cruz, J. Duch, T. Popiela, S. Wilk, M. Bińczak, M. Nocuń, E. Menezek, L. D. Geoffrion, G. Guisbiers, A. Kotarba and T. J. Webster, *Mater. Sci. Eng. C*, 2021, **120**, 111703.
- 68 K. Pulskamp, S. Diabaté and H. F. Krug, *Toxicol. Lett.*, 2007, **168**, 58–74.
- 69 K. Pulskamp, J. M. Wörle-Knirsch, F. Hennrich, K. Kern and H. F. Krug, *Carbon*, 2007, **45**, 2241–2249.
- 70 C. Gaillard, G. Cellot, S. Li, F. M. Toma, H. Dumortier, G. Spalluto, B. Cacciari, M. Prato, L. Ballerini, and A. Bianco, *Adv. Mater.*, 2009, **21**, 2903–2908.
- 71 Y. Hiraku, F. Guo, N. Ma, T. Yamada, S. Wang and S. Kawanishi, *Part. Fibre Toxicol.*, 2016, **13**, 1–21.
- 72 B. N. Eldridge, F. Xing, C. D. Fahrenholtz, R. N. Singh, W. Salem, and W. Salem, *Toxicol In Vitro.*, 2017, **41**, 223-231.
- 73 J. Czarnecka, M. Wiśniewski, N. Forbot, P. Bolibok, A. P. Terzyk and K. Roszek, *Materials (Basel)*, 2020, **13**, 2060.
- 74 A. K. Vidanapathiran, X. Lai, S. C. Hilderbrand, J. E. Pitzer, R. Podila, S. J. Sumner, T. R. Fennell, C. J. Wingard, F. A. Witzmann and J. M. Brown, *Toxicology*, 2012, **302**, 114–122.
- 75 G. Bardi, P. Tognini, G. Ciofani, V. Raffa, M. Costa and T. Pizzorusso, *Nanomedicine*, 2009, **5**, 96–104.
- 76 O. Vittorio, V. Raffa and A. Cuschieri, *Nanomedicine*, 2009, **5**, 424–431.
- 77 D. Liu, L. Wang, Z. Wang, and A. Cuschieri, *Nanoscale Res Lett.*, 2012, **7**, 361.
- 78 A. A. Kroustalli, S. N. Kourkouli and D. D. Deligianni, *Ann. Biomed. Eng.*, 2013, **41**, 2655–2665.
- 79 S. Sweeney, D. Berhanu, S. K. Misra, A. J. Thorley, E. Valsami-Jones and T. D. Tetley, *Carbon*, 2014, **78**, 26–37.
- 80 M. Allegri, D. K. Perivoliotis, M. G. Bianchi, M. Chiu, A. Pagliaro, M. A. Koklioti, A. F. A. Trompeta, E. Bergamaschi, O. Bussolati and C. A. Charitidis, *Toxicol. Reports*, 2016, **3**, 230-243.

- 81 M. Sano, M. Izumiya, H. Haniu, and K. Ueda, *Nanomaterials (Basel)*, 2020, **10**, 1374.
- 82 J. S. Kim, K. S. Song, J. K. Lee, Y. C. Choi, I. S. Bang, C. S. Kang and I. J. Yu, *Arch Toxicol.*, 2012, **86**, 553-562.
- 83 J. S. Kim, K. S. Song and I. J. Yu, *Int. J. Toxicol.*, 2016, **35**, 27–37.
- 84 A. A. Shvedova, V. Castranova, E. R. Kisin, D. Schwegler-Berry, A. R. Murray, V. Z. Gandelsman, A. Maynard and P. Baron, *J. Toxicol. Environ. Health A.*, 2003, **66**, 1909-1926.
- 85 X. G. G. Jia, H. Wang, L. Yan, H. Wang, P. Pei, T. Yan and Y. Zhao, *Environ. Sci. Toxicol.*, 2005, **39**, 1378–1383.
- 86 Y. Zhu, W. Li, Q. Li, Y. Li and Y. Li, *Carbon*, 2009, **47**, 1351–1358.
- 87 J. Wang, R. H. Sun, N. Zhang, H. Nie, J. H. Liu, J. N. Wang, H. Wang and Y. Liu, *Carbon*, 2009, **47**, 1752–1760.
- 88 D. M. Ren, M. Li, Y. Y. Dong, Y. Cheng, X. R. Yang, Y. D. Zou, H. Y. Zheng, H. Bai, X. G. Chu and Jun-Bing Wang, *Synthesis and Reactivity in Inorganic, Metal-Organic, and Nano-Metal Chemistry*, 2009, **39**, 600-604.
- 89 D. Liu, C. Yi, D. Zhang, J. Zhang and M. Yang, *ACS Nano*, 2010, **4**, 2185–2195.
- 90 X. Zhao, D. Lu, F. Hao and R. Liu, *J. Hazard. Mater.*, 2015, **292**, 98–107.
- 91 M. Luo, P. Chen, J. Wang, X. Deng, L. Dong, M. Wu and X. Shen, *Sci. China Chem.*, 2016, **59**, 918–926.
- 92 H. Haniu, N. Saito, Y. Matsuda, Kim, Park, T. Tsukahara, Y. Usui, S. Aoki, Ogihara, Hara, Takanashi, M. Okamoto, Ishigaki, Nakamura, H. Kato, *Int. J. Nanomedicine*, 2011, **6**, 3487–3497.
- 93 H. Haniu, N. Saito, Y. Matsuda, Kim, Park, T. Tsukahara, Y. Usui, S. Aoki, Ogihara, Hara, Takanashi, M. Okamoto, Ishigaki, Nakamura, H. Kato, *Int. J. Nanomedicine*, 2011, **6**, 3295-3307.
- 94 H. Haniu, N. Saito, Y. Matsuda, T. Tsukahara, Y. Usui, K. Maruyama, S. Takanashi, K. Aoki, S. Kobayashi, H. Nomura, M. Tanaka, M. Okamoto and H. Kato, *Int. J. Nanomedicine*, 2014, **9**, 1979-90.
- 95 T. I. Chao, S. Xiang, J. F. Lipstate, C. Wang and J. Lu, *Adv. Mater.*, 2010, **22**, 3542–3547.
- 96 S. Sarkar, C. Sharma, R. Yog, A. Periakaruppan, O. Jejelowo, R. Thomas, E. V. Barrera, A. C. Rice-Ficht, B. L. Wilson and G. T. Ramesh, *J. Nanosci. Nanotechnol.*, 2007, **7**, 584–592.

- 97 D. Elgrabli, S. Abella-Gallart, O. Aguerre-Chariol, F. Robidel, F. Rogerieux, J. Boczkowski and G. Lacroix, *Nanotoxicology*, 2007, **1**, 266-278.
- 98 M. Song, F. Wang, L. Zeng, J. Yin, H. Wang and G. Jiang, *Environ. Sci. Technol.*, 2014, **48**, 13978–13984.
- 99 M. Yu, R. Chen, Z. Jia, J. Chen, J. Lou, S. Tang and X. Zhang, *Int. J. Toxicol.*, 2016, **35**, 17–26.
- 100 E. Rozhina, S. Batasheva, R. Miftakhova, X. Yan, A. Vikulina, D. Volodkin, R. Fakhrullin, *Applied Clay Science*, 2021, **205**, 106041.
- 101 H. L. Karlsson, P. Cronholm, J. Gustafsson, L. Möller and L. Mo, *Chem. Res. Toxicol.*, 2008, **21**, 1726–1732..
- 102 M. De Nicola, S. Bellucci, E. Traversa, G. De Bellis, F. Micciulla and L. Ghibelli, *J. Phys. Condens. Matter*, 2008, **20**, 474204..
- 103 H. K. Lindberg, G. C.-M. Falck, S. Suhonen, M. Vippola, E. Vanhala, J. Catalán, K. Savolainen and H. Norppa, *Toxicol. Lett.*, 2009, **186**, 166–173.
- 104 P. Ravichandran, S. Baluchamy, B. Sadanandan, R. Gopikrishnan, S. Biradar, V. Ramesh, J. C. Hall and G. T. Ramesh, *Apoptosis*, 2010, **15**, 1507–1516.
- 105 X. He, S. Young, D. Schwegler-berry, W. P. Chisholm and J. E. Fernback, *Chem. Res. Toxicol.*, 2011, **24**, 2237-2248.
- 106 D. Gutiérrez-Praena, S. Pichardo, E. Sánchez, A. Grilo, A. M. Cameán and A. Jos, *Toxicol. In Vitro*, 2011, **25**, 1883–1888.
- 107 M. L. Di Giorgio, S. Di Bucchianico, A. M. Ragnelli, P. Aimola, S. Santucci and A. Poma, *Mutat. Res. - Genet. Toxicol. Environ. Mutagen.*, 2011, **722**, 20–31.
- 108 B. Angoth, H. Lingabathula, D. Gandamalla and N. R. Yellu, *International Journal of Pharmacy and Pharmaceutical Sciences*, 2014, **6**, 379-382.
- 109 J. Long, Y. Xiao, L. Liu and Y. Cao, *J. Nanobiotechnology*, 2017, **15**, 80.
- 110 P. Kumarathanan, D. Breznan, D. Das, M. A. Salam, and Y. Siddiqui, *Nanotoxicology*, 2015, **9**, 148-161.
- 111 A. Magrez, S. Kasas, V. Salicio, N. Pasquier, J. W. Seo and M. Celio, *Am. Chem. Soc.*, 2006, **6**, 1121–1125.
- 112 L. Zhu, D. W. Chang, L. Dai, and Y. Hong, *Nano Lett.*, 2007, **7**, 3592-3597
- 113 J. Yu, S. Liu, B. Wu, Z. Shen, G. N Cherr, X.-X. Zhang and M. Li, *Environ. Sci. Technol.*, 2016, **50**, 3985–3994.
- 114 J. Long, Y. Xiao, L. Liu and Y. Cao, *J. Nanobiotechnology*, 2017, **15**, 80.



- 115 N. Lu, Y. Sui, R. Tian and Y. Peng, *Chemical Research in Toxicology*, 2018, **31**, 1061-1068.
- 116 N. Lu, Y. Sui, Y. Ding, R. Tian, L. Li and F. Liu, *Chemico-Biological Interactions*, 2018, **295**, 64-72.
- 117 J. Long, W. Ma, Z. Yu, H. Liu and Y. Cao, *Nanotoxicology*, 2019, **13**, 938-951.
- 118 K. Lee, P. Lo, G. Lee, J. Zheng and E. Cho, *J. Biotechnol.*, 2019, **296**, 14–21.
- 119 151 X. Zhao, S. Chang, J. Long, J. Li, X. Li and Y. Cao, *Food Chem. Toxicol.*, 2019, **126**, 169–177.
- 120 H. Yang, J. Li, C. Yang, H. Liu and Y. Cao, *Toxicol. Appl. Pharmacol.*, 2019, **374**, 11–19.
- 121 Y. Sun, J. Gong and Y. Cao, *Int. J. Nanomedicine*, 2019, **14**, 9285-9294.
- 122 P. Wick, P. Manser, L. K. Limbach, U. Dettlaff-Weglikowska, F. Krumeich, S. Roth, W. J. Stark and A. Bruinink, *Toxicol. Lett.*, 2007, **168**, 121-131.
- 123 L. Belyanskaya, S. Weigel, C. Hirsch, U. Tobler, H. F. Krug and P. Wick, *Neurotoxicology*, 2009, **30**, 702–711.124 J. Kaiser and P. Wick, *J. King Saud Univ. - Sci.*, 2013, **25**, 15–27.
- 125 S. Sarkar, C. Sharma, R. Yog, A. Periakaruppan, O. Jejelowo, R. Thomas, E. V. Barrera, A. C. Rice-Ficht, B. L. Wilson and G. T. Ramesh, *J. Nanosci. Nanotechnol.*, 2007, **7**, 584–592.
- 126 J. M. Wo, K. Pulskamp and H. F. Krug, *Nano Lett.*, 2006, **6**, 1261-1268.
- 127 M. R. Azari, Y. Mohammadian, J. Pourahmad, F. Khodaghali, H. Peirovi, Y. Mehrabi, M. Omid and A. Rafieepour, *Environ. Sci. Pollut. Res. Int.*, 2019, **26**, 12709–12719.
- 128 M. R. Azari and Y. Mohammadian, *Environ. Sci. Pollut. Res. Int.*, 2020, **27**, 15401-15406.
- 129 K. Kyriakidou, D. Brasinika, A. F. A. Trompeta, E. Bergamaschi and I. K. Karoussis, *Food Chem. Toxicol.*, 2020, **141**, 111374.
- 130 M. Ahamed, M.J. Akhtar, M.A.M. Khan, *Int. J. Environ. Res. Public Health*, 2020, **17**, 8221.
- 131 A. Simon-Deckers, B. Gouget, M. Mayne-L’Hermite, N. Herlin-Boime, C. Reynaud and M. Carrière, *Toxicology*, 2008, **253**, 137–146.
- 132 A. Casey, E. Herzog, F. M. Lyng, H. J. Byrne, G. Chambers and M. Davoren, *Toxicol. Lett.*, 2008, **179**, 78–84.

- 133 A. R. N. Reddy, Y. N. Reddy, D. R. Krishna and V. Himabindu, *Toxicol. & Environ. Chem.*, 2010, **92**, 1697-1703.
- 134 C. L. Ursini, D. Cavallo, A. M. Fresegha, A. Ciervo, R. Maiello, G. Buresti, S. Casciardi, F. Tombolini, S. Bellucci and S. Iavicoli, *Toxicol. Vitr.*, 2012, **26**, 831–840..
- 135 G. Visalli, M. P. Bertuccio, D. Iannazzo, A. Piperno, A. Pistone and A. di Pietro, *Toxicol. In Vitro*, 2015, **29**, 352–362.
- 136 F. Charbgoon, M. Behmanesh and M. Nikkhah, *Biotechnol. Appl. Biochem.*, 2015, **62**, 598–605.
- 137 G. Visalli, A. Facciola, D. Iannazzo, A. Piperno, A. Pistone and A. Di Pietro, *J. Trace Elem. Med. Biol.*, 2017, **43**, 153-160.
- 138 H. Requardt, A. Braun, P. Steinberg, S. Hampel and T. Hansen, *Toxicol. In Vitro*, 2019, **60**, 12–18.
- 139 X. G. G. Jia, H. Wang, L. Yan, H. Wang, P. Pei, T. Yan and Y. Zhao, *Environ. Sci. Toxicol.*, 2005, **39**, 1378–1383.
- 140 A. M. Schrand, L. Dai, J. J. Schlager, S. M. Hussain and E. Osawa, *Diam. Relat. Mater.*, 2007, **16**, 2118–2123..
- 141 B. Matta-Domjan, A. King, S. Totti, C. Matta, G. Dover, P. Martinez, A. Zakhidov, R. La Ragione, H. Macedo, I. Jurewicz, A. Dalton and E. G. Velliou, *J. Biomed. Mater. Res. B Appl. Biomater.*, 2018, **106**, 1637-1644.
- 142 H. Haniu, N. Saito, Y. Matsuda, Kim, Park, T. Tsukahara, Y. Usui, S. Aoki, Ogihara, Hara, Takanashi, M. Okamoto, Ishigaki, Nakamura, H. Kato, *Int. J. Nanomedicine*, 2011, **6**, 3487–3497.
- 143 H. K. Lindberg, G. C-M Falck, R. Singh, S. Suhonen, H. Järventaus, E. Vanhala, J. Catalán, P. B. Farmer, K. M. Savolainen and H. Norppa, *Toxicology*, 2013, **313**, 24–37.
- 144 K. Fraser, V. Kodali, N. Yanamala, M. E. Birch, L. Cena, G. Casuccio, K. Bunker, T.L. Lersch, D. E. Evans, A. Stefaniak, M. A. Hammer, M. L. Kashon, T. Boots, T. Eye, J. Hubczak, S. A. Friend, M. Dahm, M.K. Schubauer-Berigan, K. Siegrist, D. Lowry, A. K. Bauer, L. M. Sargent and A. Erdely, *Part. Fibre Toxicol.*, 2020, **17**, 1–26.
- 145 T. Gabay, E. Jakobs, E. Ben-jacob and Y. Hanein, *Physica A*, 2005, **350**, 611–621.
- 146 P. Galvan-Garcia, E. W. Keefer, F. Yang, M. Zhang, S. Fang, A. A. Zakhidov, R. H. Baughman and M. I. Romero, *J. Biomater. Sci. Polym. Ed.*, 2007, **18**, 1245–1261.

- 147 K. Matsumoto, C. Sato, Y. Naka, R. Whitby, and N. Shimizu, *Nanotechnology*, 2010, **21**, 115101.
- 148 A. O. Lobo, E. F. Antunes, M. B. S. Palma, C. Pacheco-Soares, V. J. Trava-Airoldi and E. J. Corat, *Mater. Sci. Eng. C*, 2008, **28**, 532–538.
- 149 A. O. Lobo, M. A. F. Corat, E. F. Antunes, M. B. S. Palma, C. Pacheco-Soares, E. E. Garcia, E. J. Corat, *Carbon*, 2010, **48**, 245–254.
- 150 Y. Guang Han, J. Xu, Z. Gui Li, G. Gang Ren and Z. Yang, *Neurotoxicology*, 2012, **33**, 1128–1134.
- 151 X. Zhang, S. Prasad, S. Niyogi, A. Morgan, M. Ozkan and C. S. Ozkan, *Sensors Actuators B Chem.*, 2005, **106**, 843–850.
- 152 Z. Tao, P. Wang, L. Wang, L. Xiao, F. Zhang and J. Na, *J. Mater. Chem. B*, 2014, **2**, 471–476.
- 153 Q. Lu, J. M. Moore, G. Huang, A. S. Mount, A. M. Rao, L. L. Larcom and P. C. Ke, *Nano Lett.*, 2004, **4**, 2473–2477.
- 154 F. A. Witzmann and N. A. Monteiro-Riviere, *Nanomedicine.*, 2006, **2**, 158–168.
- 155 A. O. Inman and L. W. Zhang, *Toxicol. Appl. Pharmacol.*, 2009, **234**, 222–235.
- 156 J. S. Yan, M. Orecchioni, F. Vitale, J. A. Coco, G. Duret, S. Antonucci, S. S. Pamulapati, L. W. Taylor, O. S. Dewey, M. Di Sante, A. M. Segura, C. Gurcan, F. Di Lisa, A. Yilmazer, M. D. McCauley, J. T. Robinson, M. Razavi, K. Ley, L. G. Delogu and M. Pasquali, *Carbon*, 2021, **173**, 462–476.
- 157 A. R. N. Reddy, Y. N. Reddy, D. R. Krishna and V. Himabindu, *Toxicol. & Environ. Chem.*, 2010, **92**, 1697–1703.
- 158 A. Rama, N. Reddy, Y. Narsimha, D. Rama and V. Himabindu, *Toxicology*, 2010, **272**, 11–16.
- 159 L. C. Ong, Y. F. Tan, B. S. Tan, F. F. L. Chung, S. K. Cheong, and C. O. Leong, *Toxicol. Appl. Pharmacol.*, 2017, **329**, 347–357.
- 160 L. Q. Chen, P. P. Hu, L. Zhang, S. Z. Huang, L. F. Luo and C. Z. Huang, *Sci. China Chem.*, 2012, **55**, 2209–2216.
- 161 C. J. Gannon, P. Cherukuri, B. I. Yakobson, L. Cagnet, J. S. Kanzius, C. Kittrell, R. B. Weisman, M. Pasquali, H. K. Schmidt, R. E. Smalley, S. A. Curley, *Cancer*, 2007, **110**, 2654–2665.
- 162 C. Espinosa, L. M. Hoyos-palacio, L. López, J. A. Carlos-cornelio and I. C. Ortiz-trujillo, *Integr. Med. Res.*, 2020, **9**, 6059–6072.

- 163 M. P. Mattson, R. C. Haddon and A. M. Rao, *J. Mol. Neurosci.*, 2000, **14**, 175–182.
- 164 H. Hu, Y. Ni, V. Montana, R. C. Haddon and V. Parpura, *Nano Lett.*, 2004, **4**, 507–511.
- 165 S. Fiorito, A. Serafino, F. Andreola and P. Bernier, *Carbon*, 2006, **44**, 1100–1105.
- 166 C. Cheng, K. H. Müller, K. K. Koziol, J. N. Skepper, P. A. Midgley, M. E. Welland and A. E. Porter, *Biomaterials*, 2009, **30**, 4152–4160.
- 167 S. Boncel, K. H. Müller, J. N. Skepper, K. Z. Walczak and K. K. K. Koziol, *Biomaterials*, 2011, **32**, 7677–7686.
- 168 R. J. Snyder, K. C. Verhein, H. L. Vellers, A. B. Burkholder, S. Garantziotis, and S. Management, *Nanotoxicology*, 2019, **13**, 1344–1361.
- 169 O. M. Perepelytsina, A. P. Ugnivenko, A. V Dobrydnev, O. N. Bakalinska, A. I. Marynin and M. V Sydorenko, *Nanoscale Res. Lett.*, 2018, **13**, 286.
- 170 G. Kucukayan-Dogu, D. Gozen, V. Bitirim, K. C. Akcali and E. Bengu, *Appl. Surf. Sci.*, 2015, **351**, 27–32.
- 171 J. Chłopek, B. Czajkowska, B. Szaraniec, E. Frackowiak, K. Szostak and F. Béguin, *Carbon*, 2006, **44**, 1106–1111.172 N. Azad, A. K. V Iyer, L. Wang, Y. Liu, Y. Lu and Y. Rojanasakul, *Nanotoxicology*, 2013, **7**, 157–168.
- 173 A. Warowicka, B. M. Maciejewska, J. Litowczenko, M. Kościński, A. Baranowka-Korczyc, M. Jasiurkowska-Delaporte, K. K. Koziol and S. Jurga, *Compos. Sci. Technol.*, 2016, **136**, 29–38.
- 174 S. Sirivisoot, C. Yao, X. Xiao, B. W. Sheldon and T. J. Webster, *Nanotechnology*, 2007, **18**.
- 175 E. Flahaut, M. C. Durrieu, M. Remy-Zolghadri, R. Bareille and C. Baquey, *J. Mater. Sci.*, 2006, **41**, 2411–2416.
- 176 E. Flahaut, M. C. Durrieu, M. Remy-Zolghadri, R. Bareille and C. Baquey, *Carbon*, 2006, **44**, 1093–1099.
- 177 J. Long, X. Li, Y. Kang, Y. Ding, Z. Gu and Y. Caob, *RSC Adv.*, 2018, **8**, 9253–9260.
- 178 Y. Y. Guo, J. Zhang, Y. F. Zheng, J. Yang and X. Q. Zhu, *Mutat. Res. - Genet. Toxicol. Environ. Mutagen.*, 2011, **721**, 184–191.
- 179 M. Orecna, S. H. De Paoli, O. Janouskova, T. Z. Tegegn, M. Filipova, J. E. Bonevich, K. Holada and J. Simak, *Nanomedicine*, 2014, **10**, 939–948.

- 180 S. L. Montes-Fonseca, E. Orrantia-Borunda, A. Duarte-Möller, A. Luna-Velasco, M. Román-Aguirre, C. González Horta and B. Sánchez-Ramírez, *J. Nanomaterials*, 2012, **12**, 1–7.
- 181 Z. Liu, Y. Liu and D. Peng, *J. Biomed. Mater. Res. - Part A*, 2015, **103**, 2770–2777.
- 182 S. Phuyal, M. Kasem, O. Knittelfelder, A. Sharma, D. de M. Fonseca, V. Vebraitė, S. Shaposhnikov, G. Slupphaug, V. Skaug and S. Zienoldiny, *Nanotoxicology*, 2018, **12**, 138–152.
- 183 Environment directorate joint meeting of the chemicals committee and the working party on chemicals, pesticides and biotechnology, [http://www.oecd.org/officialdocuments/publicdisplaydocumentpdf/?cote=env/jm/mono\(2015\)17/ann9&doclanguage=en](http://www.oecd.org/officialdocuments/publicdisplaydocumentpdf/?cote=env/jm/mono(2015)17/ann9&doclanguage=en) (accessed October 2021).  
184 M. Song, L. Zeng, S. Yuan, J. Yin, H. Wang and G. Jiang, *Chemosphere*, 2013, **92**, 576–582.
- 185 S. M. Reamon-buettner, A. Hackbarth, A. Leonhardt, A. Braun, and C. Ziemann, *Mech. Ageing Dev.*, 2021, **193**, 111412.
- 186 J. Catalán, H. Järventaus, M. Vippola, K. Savolainen and H. Norppa, *Nanotoxicology*, 2012, **6**, 825–836.
- 187 A. O. Lobo, M. A. F. Corat, E. F. Antunes, S. C. Ramos, C. Pacheco-Soares and E. J. Corat, *Mater. Sci. Eng. C*, 2012, **32**, 648–652.
- 188 Y. Yun, Z. Dong, Z. Tan, M. J. Schulz and V. Shanov, *Mater. Sci. Eng. C*, 2009, **29**, 719–725.
- 189 J. G. Munguía-Lopez, E. Muñoz-Sandoval, J. Ortiz-Medina, F. J. Rodriguez-Macias and A. De Leon-Rodriguez, *J. Nanomaterials*, 2015, **2015**, 1–7.
- 190 Y. Zhang, S. F. Ali, E. Dervishi, Y. Xu, Z. Li, D. Casciano and A. S. Biris, *ACS Nano*, 2010, **4**, 3181–3186.  
191 D. M. Brown, I. A. Kinloch, U. Bangert, A. H. Windle, D. M. Walter, G. S. Walker, C. A. Scotchford, K. Donaldson and V. Stone, *Carbon*, 2007, **45**, 1743–1756.
- 192 L. Ding, J. Stilwell, T. Zhang, O. Elboudwarej, H. Jiang, J. P. Selegue, P. A. Cooke, J. W. Gray and F. Frank Chen, *Nano Lett.*, 2005, **5**, 2448–2464.
- 193 C. M. Sayes, F. Liang, J. L. Hudson, J. Mendez, W. Guo, J. M. Beach, V. C. Moore, C. D. Doyle, J. L. West, W. E. Billups, K. D. Ausman and V. L. Colvin, *Toxicol. Lett.*, 2006, **161**, 135–142.
- 194 S. Dekali, C. Bachelet, S. Maunoir-Regimbal, E. Flahaut, J. C. Debouzy and D. Crouzier, *Toxicology*, 2016, **365**, 1–8.
- 195 K. Bhattacharya, G. Kiliç, P. M. Costa and B. Fadeel, *Nanotoxicology*, 2017,

11, 809–826.
